# Supplementary material
Source: Elsevier journal article supplement (https://www.sciencedirect.com/science/article/pii/S1413355521000551)
Supplement: mmc1 [file S1413355521000551:mmc1.docx]

**Supplementary Table 1.** Unadjusted Means ± SD for each outcome by study arm and risk category at each time point

|  | **Baseline** | | | | | | | | | **3 months** | | | | | | | | | | | | | | **6 months** | | | | | | | | | | | | | **12 months** | | | | | | | | | |
| --- | --- | --- | --- | --- | --- | --- | --- | --- | --- | --- | --- | --- | --- | --- | --- | --- | --- | --- | --- | --- | --- | --- | --- | --- | --- | --- | --- | --- | --- | --- | --- | --- | --- | --- | --- | --- | --- | --- | --- | --- | --- | --- | --- | --- | --- | --- |
|  | *CPC Pathway*  *(n=XX)* | | *Usual Care*  *(n=XX)* | | | | | | | *CPC Pathway*  *(n=XX)* | | | | | | | *Usual Care*  *(n=XX)* | | | | | | | *CPC Pathway*  *(n=XX)* | | | | | *Usual Care*  *(n=XX)* | | | | | | | | *CPC Pathway*  *(n=XX)* | | | | | | | | *Usual Care*  *(n=XX)* | |
|  | *Low risk* | *High risk* | | *Low risk* | | | *High risk* | | | | *Low risk* | | | *High risk* | | | | *Low risk* | | | *High risk* | | | | *Low risk* | | | *High risk* | | *Low risk* | | | *High risk* | | | | | *Low risk* | | | *High risk* | | | | *Low risk* | *High risk* |
| *Primary outcomes* |  | |  | | | | | | |  | | | | | | |  | | | | | | |  | | | | |  | | | | | | | |  | | | | | | | |  | |
| NDI (0-100) | XX.X (XX.X) | XX.X (XX.X) | | XX.X (XX.X) | | | XX.X (XX.X) | | | | XX.X (XX.X) | | | XX.X (XX.X) | | | | XX.X (XX.X) | | | XX.X (XX.X) | | | | XX.X (XX.X) | | | XX.X (XX.X) | | XX.X (XX.X) | | | | XX.X (XX.X) | | | | XX.X (XX.X) | | | | XX.X (XX.X) | | | XX.X (XX.X) | XX.X (XX.X) |
| Global recovery (-5 to +5) | XX.X (XX.X) | XX.X (XX.X) | | | XX.X (XX.X) | | | XX.X (XX.X) | | | | XX.X (XX.X) | | | XX.X (XX.X) | | | | XX.X (XX.X) | | | XX.X (XX.X) | | | | XX.X (XX.X) | | XX.X (XX.X) | | | XX.X (XX.X) | | | | XX.X (XX.X) | | | | XX.X (XX.X) | | | | XX.X (XX.X) | | XX.X (XX.X) | XX.X (XX.X) |
| *Secondary outcomes* | | | | | | | | | | | | | | | | | | | | | | | | | | | | | | | | | | | | | | | | | | | | | | |
| PSEQ (0-60) | XX.X (XX.X) | XX.X (XX.X) | | | XX.X (XX.X) | | | XX.X (XX.X) | | | | XX.X (XX.X) | | | XX.X (XX.X) | | | | XX.X (XX.X) | | | XX.X (XX.X) | | | | XX.X (XX.X) | | XX.X (XX.X) | | | XX.X (XX.X) | | | | XX.X (XX.X) | | | | XX.X (XX.X) | | | | XX.X (XX.X) | | XX.X (XX.X) | XX.X (XX.X) |
| Neck pain intensity, past wk (0–10) | XX.X (XX.X) | XX.X (XX.X) | | | | XX.X (XX.X) | | | XX.X (XX.X) | | | | XX.X (XX.X) | | | XX.X (XX.X) | | | | XX.X (XX.X) | | | XX.X (XX.X) | | | | XX.X (XX.X) | XX.X (XX.X) | | | | XX.X (XX.X) | | | | XX.X (XX.X) | | | | XX.X (XX.X) | | | | XX.X (XX.X) | XX.X (XX.X) | XX.X (XX.X) |
| Neck pain intensity, past 24h (0–10) | XX.X (XX.X) | XX.X (XX.X) | | | | XX.X (XX.X) | | | XX.X (XX.X) | | | | XX.X (XX.X) | | | XX.X (XX.X) | | | | XX.X (XX.X) | | | XX.X (XX.X) | | | | XX.X (XX.X) | XX.X (XX.X) | | | | XX.X (XX.X) | | | | XX.X (XX.X) | | | | XX.X (XX.X) | | | | XX.X (XX.X) | XX.X (XX.X) | XX.X (XX.X) |
| WHODASII | XX.X (XX.X) | XX.X (XX.X) | | | | XX.X (XX.X) | | | XX.X (XX.X) | | | | XX.X (XX.X) | | | XX.X (XX.X) | | | | XX.X (XX.X) | | | XX.X (XX.X) | | | | XX.X (XX.X) | XX.X (XX.X) | | | | XX.X (XX.X) | | | | XX.X (XX.X) | | | | XX.X (XX.X) | | | | XX.X (XX.X) | XX.X (XX.X) | XX.X (XX.X) |
| PDS Total Score | XX.X (XX.X) | XX.X (XX.X) | | | | XX.X (XX.X) | | | XX.X (XX.X) | | | | XX.X (XX.X) | | | XX.X (XX.X) | | | | XX.X (XX.X) | | | XX.X (XX.X) | | | | XX.X (XX.X) | XX.X (XX.X) | | | | XX.X (XX.X) | | | | XX.X (XX.X) | | | | XX.X (XX.X) | | | | XX.X (XX.X) | XX.X (XX.X) | XX.X (XX.X) |
| PCS Total (0-52) | XX.X (XX.X) | XX.X (XX.X) | | | | XX.X (XX.X) | | | XX.X (XX.X) | | | | XX.X (XX.X) | | | XX.X (XX.X) | | | | XX.X (XX.X) | | | XX.X (XX.X) | | | | XX.X (XX.X) | XX.X (XX.X) | | | | XX.X (XX.X) | | | | XX.X (XX.X) | | | | XX.X (XX.X) | | | | XX.X (XX.X) | XX.X (XX.X) | XX.X (XX.X) |
| SF-12 | XX.X (XX.X) | XX.X (XX.X) | | | | XX.X (XX.X) | | | XX.X (XX.X) | | | | XX.X (XX.X) | | | XX.X (XX.X) | | | | XX.X (XX.X) | | | XX.X (XX.X) | | | | XX.X (XX.X) | XX.X (XX.X) | | | | XX.X (XX.X) | | | | XX.X (XX.X) | | | | XX.X (XX.X) | | | | XX.X (XX.X) | XX.X (XX.X) | XX.X (XX.X) |
| PCS | XX.X (XX.X) | XX.X (XX.X) | | | | XX.X (XX.X) | | | XX.X (XX.X) | | | | XX.X (XX.X) | | | XX.X (XX.X) | | | | XX.X (XX.X) | | | XX.X (XX.X) | | | | XX.X (XX.X) | XX.X (XX.X) | | | | XX.X (XX.X) | | | | XX.X (XX.X) | | | | XX.X (XX.X) | | | | XX.X (XX.X) | XX.X (XX.X) | XX.X (XX.X) |
| MCS | XX.X (XX.X) | XX.X (XX.X) | | | | XX.X (XX.X) | | | XX.X (XX.X) | | | | XX.X (XX.X) | | | XX.X (XX.X) | | | | XX.X (XX.X) | | | XX.X (XX.X) | | | | XX.X (XX.X) | XX.X (XX.X) | | | | XX.X (XX.X) | | | | XX.X (XX.X) | | | | XX.X (XX.X) | | | | XX.X (XX.X) | XX.X (XX.X) | XX.X (XX.X) |

*n represents the number of participants with primary outcome data at each time point.

CPC, Clinical Pathway of Care; NDI, Neck Disability Index; PSEQ, Pain Self-Efficacy Questionnaire; WHODASII, The World Health Organization Disability Assessment Schedule II; PDS, Posttraumatic Stress Diagnostic Scale; PCS, Pain Catastrophizing Scale; SF-12 PCS, Generic measure of health status – physical component; SF-12 MCS, Generic measure of health status – mental component.
